# Supplementary material
Source: PubMed Central journal article supplement (PMC3733308)
Supplement: supp_djt055_jnci_JNCI_12_1484_s01.pdf [file supp_djt055_jnci_JNCI_12_1484_s01.pdf]

**Supplementary Table 1. Current listing of NCI MRTB Working Groups and leader contact information**

| <b>Working Group</b>       | <b>Leadership</b>           | <b>Institution</b>                  | <b>Email contact</b>                   |
|----------------------------|-----------------------------|-------------------------------------|----------------------------------------|
| Breast-to-Brain Metastasis | Chair:<br>Minesh Mehta      | Northwestern                        | mmehta@nmff.org                        |
|                            | Co-Chair:<br>Nancy Lin      | Dana Farber Cancer Institute        | Nancy_Lin@dfci.harvard.edu             |
| Colorectal Cancer          | Chair:<br>Thomas George     | University of Florida               | tgeorge@ufl.edu                        |
|                            | Co-Chair:<br>Theodore Hong  | Mass Gen Hosp                       | Tshong1@partners.org                   |
| Head & Neck                | Chair:<br>Christine Chung   | Johns Hopkins                       | cchung11@jhmi.edu                      |
|                            | Co-Chair:<br>John Buatti    | University of Iowa                  | John-buatti@uiowa.edu                  |
| Hepatocellular carcinoma   | Chair:<br>Chandan Guha      | Albert Einstein College of Medicine | CGUHA@montefiore.org                   |
|                            | Co-Chair:<br>Jinsil Seong   | Yonsei University                   | jsseong@yuhs.ac                        |
| Lung Cancer                | Chair:<br>Bo Lu             | Thomas Jefferson                    | Bo.Lu@jeffersonhospital.org            |
|                            | Co-Chair:<br>Steven H. Lin  | MD Anderson                         | shlin@mdanderson.org                   |
| Pancreatic Cancer          | Chair:<br>Edgar Ben-Josef   | University of Pennsylvania          | Edgar.Ben-Josef@uphs.upenn.edu         |
|                            | Co-Chair:<br>TBN            |                                     |                                        |
| Sarcoma                    | Chair:<br>Dian Wang         | Medical College of Wisconsin        | DWang@mcw.edu                          |
|                            | Co-Chair:<br>Peter Houghton | The Ohio State University           | Peter.Houghton@nationwidechildrens.org |
